# Supplementary material
Source: PubMed Central journal article supplement (PMC5923166)
Supplement: AAC.02112-17_zac005187096s1.pdf [file AAC.02112-17_zac005187096s1.pdf]

**Supplementary Table 1A.** Fecal microbiota composition by taxonomy following antibiotic regimens.

|                           |                |                             | Fidaxomicin          |       |       |       |        |        |        | Vancomycin |       |       |       |        |        |        |       |
|---------------------------|----------------|-----------------------------|----------------------|-------|-------|-------|--------|--------|--------|------------|-------|-------|-------|--------|--------|--------|-------|
|                           |                |                             | Day 0                | Day 3 | Day 5 | Day 8 | Day 12 | Day 16 | Day 22 | Day 0      | Day 3 | Day 5 | Day 8 | Day 12 | Day 16 | Day 22 |       |
| Firmicutes                | Bacilli        | Bacillales                  | 0.00                 | 0.00  | 0.00  | 0.00  | 0.01   | 0.00   | 0.00   | 0.00       | 0.08  | 0.00  | 0.00  | 0.01   | 0.00   | 0.00   |       |
|                           |                | Lactobacillales             | Enterococcus         | 0.00  | 0.00  | 0.33  | 0.00   | 0.00   | 0.00   | 0.01       | 0.00  | 0.11  | 13.70 | 0.17   | 0.02   | 0.00   | 0.00  |
|                           |                |                             | Lactobacillus        | 13.81 | 3.05  | 15.66 | 11.76  | 14.30  | 28.66  | 11.22      | 16.07 | 28.67 | 3.17  | 3.58   | 8.08   | 14.47  | 15.75 |
|                           |                |                             | Streptococcus        | 0.02  | 0.02  | 0.00  | 0.00   | 0.00   | 0.00   | 0.00       | 0.00  | 0.04  | 0.02  | 0.00   | 0.00   | 0.00   | 0.00  |
|                           | Clostridia     | Other Clostridiales         |                      | 21.72 | 0.04  | 0.04  | 0.21   | 0.35   | 1.21   | 7.07       | 19.89 | 0.06  | 0.03  | 1.97   | 6.84   | 15.15  | 5.60  |
|                           |                | Lachnospiraceae             | Other                | 0.03  | 0.00  | 0.00  | 0.02   | 0.18   | 0.05   | 0.05       | 0.00  | 0.00  | 0.00  | 0.00   | 0.05   | 0.00   | 0.05  |
|                           |                |                             | Blautia              | 0.38  | 0.00  | 0.00  | 1.10   | 4.60   | 0.96   | 1.92       | 0.71  | 0.00  | 0.00  | 0.05   | 1.11   | 0.63   | 1.27  |
|                           |                |                             | Other                | 8.18  | 0.18  | 1.90  | 7.03   | 6.60   | 3.89   | 6.75       | 6.22  | 0.00  | 0.00  | 1.62   | 7.20   | 6.60   | 8.47  |
|                           |                | Ruminococcaceae             | Roseburia            | 0.06  | 0.00  | 0.00  | 0.08   | 0.06   | 0.00   | 0.05       | 0.03  | 0.00  | 0.00  | 0.00   | 0.12   | 0.04   | 0.30  |
|                           |                |                             | Other Peptococcaceae |       | 0.05  | 0.00  | 0.00   | 0.00   | 0.09   | 0.02       | 0.04  | 0.05  | 0.00  | 0.00   | 0.00   | 0.00   | 0.00  |
|                           |                | Other Peptostreptococcaceae |                      | 11.42 | 0.01  | 0.00  | 1.41   | 0.23   | 0.00   | 3.00       | 7.29  | 0.02  | 2.56  | 2.32   | 1.57   | 0.61   | 0.27  |
|                           |                | Ruminococcaceae             | Anaerotruncus        | 0.10  | 0.00  | 0.00  | 0.00   | 0.06   | 0.00   | 0.02       | 0.04  | 0.00  | 0.00  | 0.00   | 0.01   | 0.10   | 0.03  |
|                           |                |                             | Other                | 5.09  | 0.00  | 0.15  | 0.54   | 2.70   | 1.29   | 2.23       | 2.29  | 0.00  | 0.00  | 1.10   | 5.89   | 2.20   | 2.14  |
|                           |                | Other Clostridiales         |                      | 0.17  | 0.00  | 0.00  | 0.04   | 0.21   | 0.07   | 0.06       | 0.01  | 0.35  | 0.89  | 0.02   | 0.11   | 0.12   | 0.56  |
| Other Erysipelotrichaceae |                | 25.15                       | 80.54                | 70.93 | 67.47 | 49.88 | 38.25  | 41.85  | 18.79  | 0.06       | 39.28 | 78.70 | 53.31 | 41.34  | 53.83  |        |       |
| Non Firmicutes            | Actinobacteria |                             | 7.78                 | 0.47  | 2.55  | 1.74  | 9.83   | 15.44  | 5.51   | 17.66      | 0.06  | 8.32  | 9.62  | 9.50   | 17.26  | 9.73   |       |
|                           | Bacteroidetes  |                             | 6.01                 | 6.69  | 4.70  | 8.32  | 10.80  | 10.11  | 20.18  | 10.89      | 0.00  | 0.01  | 0.35  | 5.74   | 1.34   | 1.62   |       |
|                           | Enterobacter   |                             | 0.00                 | 9.00  | 3.74  | 0.25  | 0.00   | 0.00   | 0.00   | 0.00       | 70.16 | 31.97 | 0.39  | 0.02   | 0.08   | 0.04   |       |
|                           | Other          |                             | 0.05                 | 0.01  | 0.00  | 0.01  | 0.10   | 0.05   | 0.02   | 0.05       | 0.40  | 0.06  | 0.10  | 0.43   | 0.08   | 0.34   |       |

**Supplementary Table 1B.** Colonic microbiota composition by taxonomy following antibiotic regimens.

|                           |                |                             | Fidaxomicin          |       |       |        |        |        | Vancomycin |       |       |        |        |        |       |
|---------------------------|----------------|-----------------------------|----------------------|-------|-------|--------|--------|--------|------------|-------|-------|--------|--------|--------|-------|
|                           |                |                             | Day 4                | Day 6 | Day 9 | Day 13 | Day 17 | Day 23 | Day 4      | Day 6 | Day 9 | Day 13 | Day 17 | Day 23 |       |
| Firmicutes                | Bacilli        | Bacillales                  | 0.01                 | 0.00  | 0.01  | 0.00   | 0.00   | 0.00   | 0.03       | 0.00  | 0.01  | 0.03   | 0.00   | 0.00   |       |
|                           |                | Lactobacillales             | Enterococcus         | 0.20  | 0.20  | 0.02   | 0.00   | 0.00   | 0.00       | 0.99  | 4.25  | 0.04   | 0.08   | 0.00   | 0.00  |
|                           |                |                             | Lactobacillus        | 6.62  | 4.55  | 13.15  | 24.73  | 11.02  | 12.33      | 32.10 | 1.72  | 4.17   | 3.84   | 24.12  | 11.61 |
|                           |                |                             | Streptococcus        | 0.04  | 0.04  | 0.00   | 0.01   | 0.00   | 0.01       | 0.07  | 0.02  | 0.00   | 0.04   | 0.00   | 0.00  |
|                           | Clostridia     | Other Clostridiales         |                      | 0.00  | 0.08  | 0.21   | 0.13   | 3.35   | 7.52       | 0.01  | 0.09  | 3.86   | 9.20   | 16.72  | 7.14  |
|                           |                | Lachnospiraceae             | Other                | 0.00  | 0.03  | 0.06   | 0.55   | 0.24   | 0.09       | 0.00  | 0.00  | 0.14   | 0.04   | 0.00   | 0.12  |
|                           |                |                             | Blautia              | 0.00  | 0.14  | 0.43   | 1.16   | 3.92   | 3.24       | 0.00  | 0.00  | 0.13   | 2.17   | 0.32   | 1.40  |
|                           |                |                             | Other                | 1.09  | 5.35  | 8.96   | 10.14  | 8.76   | 8.82       | 0.00  | 0.41  | 5.70   | 13.24  | 7.83   | 14.50 |
|                           |                | Ruminococcaceae             | Roseburia            | 0.00  | 0.04  | 0.02   | 0.05   | 0.11   | 0.16       | 0.00  | 0.00  | 0.18   | 0.06   | 0.02   | 0.76  |
|                           |                |                             | Other Peptococcaceae |       | 0.00  | 0.00   | 0.00   | 0.11   | 0.08       | 0.07  | 0.00  | 0.00   | 0.00   | 0.02   | 0.01  |
|                           |                | Other Peptostreptococcaceae |                      | 0.01  | 0.01  | 1.48   | 0.46   | 0.00   | 2.05       | 0.00  | 1.99  | 1.60   | 4.39   | 0.49   | 0.36  |
|                           |                | Ruminococcaceae             | Anaerotruncus        | 0.01  | 0.00  | 0.00   | 0.02   | 0.00   | 0.04       | 0.00  | 0.00  | 0.00   | 0.29   | 0.07   | 0.04  |
|                           |                |                             | Other                | 0.00  | 0.20  | 1.32   | 2.99   | 5.86   | 3.00       | 0.00  | 0.00  | 1.90   | 6.17   | 1.25   | 4.96  |
| Other Clostridiales       |                | 0.00                        | 0.10                 | 0.01  | 0.01  | 0.39   | 0.21   | 0.09   | 0.22       | 0.11  | 0.37  | 0.18   | 0.21   |        |       |
| Other Erysipelotrichaceae |                | 59.15                       | 65.01                | 60.29 | 35.00 | 37.26  | 43.02  | 0.03   | 64.69      | 73.74 | 45.30 | 30.85  | 47.31  |        |       |
| Non Firmicutes            | Actinobacteria |                             | 4.75                 | 1.20  | 1.42  | 2.41   | 9.74   | 3.30   | 0.05       | 19.50 | 6.27  | 6.30   | 15.21  | 8.51   |       |
|                           | Bacteroidetes  |                             | 5.77                 | 14.07 | 12.52 | 22.11  | 19.13  | 16.03  | 0.01       | 0.00  | 1.74  | 5.88   | 2.31   | 2.46   |       |
|                           | Enterobacter   |                             | 22.27                | 8.96  | 0.08  | 0.01   | 0.00   | 0.02   | 66.55      | 7.10  | 0.16  | 0.12   | 0.05   | 0.02   |       |
|                           | Other          |                             | 0.08                 | 0.02  | 0.04  | 0.10   | 0.11   | 0.09   | 0.09       | 0.00  | 0.27  | 2.47   | 0.57   | 0.57   |       |
